# Supplementary material
Source: PubMed Central journal article supplement (PMC6108859)
Supplement: EHP3067.s001.acco.pdf [file EHP3067.s001.acco.pdf]

**Note to readers with disabilities:** *EHP* strives to ensure that all journal content is accessible to all readers. However, some figures and Supplemental Material published in *EHP* articles may not conform to [508 standards](#) due to the complexity of the information being presented. If you need assistance accessing journal content, please contact [ehp508@niehs.nih.gov](mailto:ehp508@niehs.nih.gov). Our staff will work with you to assess and meet your accessibility needs within 3 working days.

### **Supplemental Material**

#### **Weight of Evidence for Hazard Identification: A Critical Review of the Literature**

Pierre Martin, Claire Bladier, Bette Meek, Olivier Bruyere, Eve Feinblatt, Mathilde Touvier, Laurence Watier, and David Makowski

#### **Table of Contents**

**Table S1.** National and international agencies or organizations performing risk assessment that were consulted for guidance as part of the current study.

**Table S2.** Definitions of weight of evidence and line of evidence identified in the literature.

**Figure S1.** Template to summarize WOE information from Source Documents.

#### **References**

**Table S1.** National and international agencies or organizations performing risk assessment that were consulted for guidance as part of the current study

| <b>Agency or organization</b>                                                                                                                                                                       | <b>Location</b>     |
|-----------------------------------------------------------------------------------------------------------------------------------------------------------------------------------------------------|---------------------|
| IARC (International Agency for Research on Cancer) - Monographs program                                                                                                                             | International       |
| FAO (Food and Agriculture Organization of the United Nations) - JEMRA (Joint FAO/WHO Expert Meetings on Microbiological Risk Assessment) - JECFA (Joint FAO/WHO Expert Committee on Food Additives) | International       |
| OECD (Organization for Economic Co-operation and Development)                                                                                                                                       | International       |
| WHO (World Health Organization)                                                                                                                                                                     | International       |
| ECETOC (European Centre for Ecotoxicology and Toxicology Of Chemicals)                                                                                                                              | European            |
| WCRF/AICR (World Cancer Research Fund International / American Institute for Cancer Research)                                                                                                       | International       |
| ECHA (European Chemicals Agency)                                                                                                                                                                    | European agency     |
| EFSA (European Food Safety Authority)                                                                                                                                                               | European agency     |
| EMA (European Medicines Agency)                                                                                                                                                                     | European agency     |
| JRC (Joint Research Center)                                                                                                                                                                         | European Commission |
| SCCS (Scientific Committee on Consumer Safety)                                                                                                                                                      | European Commission |
| SCHER (Scientific Committee on Health and Environmental Risks)                                                                                                                                      | European Commission |
| SCENIHR (Scientific Committee on Emerging and Newly Identified Health Risks)                                                                                                                        | European Commission |
| BfR (German Federal Institute for Risk Assessment)                                                                                                                                                  | Germany             |
| UBA (German Federal Environmental Agency)                                                                                                                                                           | Germany             |
| UFZ (Helmholtz Centre for Environmental Research)                                                                                                                                                   | Germany             |
| AGES (Austrian Agency for Health and Food Safety)                                                                                                                                                   | Austria             |
| AFSCA (Belgian Federal Agency for the Safety of the Food Chain)                                                                                                                                     | Belgium             |
| Risk Assessment Center (RAC) - Bulgarian Food Safety Agency                                                                                                                                         | Bulgaria            |
| SGL (State General Laboratory)                                                                                                                                                                      | Cyprus              |
| Croatian Food Agency                                                                                                                                                                                | Croatia             |
| DTU-Food (National Food Institute DTU)                                                                                                                                                              | Denmark             |
| AECOSAN (The Spanish Agency for Consumer Affairs, Food Safety and Nutrition)                                                                                                                        | Spain               |
| Ministry of Agriculture of Estonia - Food Safety Department                                                                                                                                         | Estonia             |
| Evira (Finnish Food Safety Authority)                                                                                                                                                               | Finland             |
| EFET (Hellenic Food Authority)                                                                                                                                                                      | Greece              |
| National Food Chain Safety Office                                                                                                                                                                   | Hungary             |
| The Icelandic Food and Veterinary Authority                                                                                                                                                         | Iceland             |
| FSAI (Food Safety Authority of Ireland)                                                                                                                                                             | Ireland             |
| Istituto Superiore di Sanità (ISS)                                                                                                                                                                  | Italy               |
| Institute of Food Safety, Animal Health and Environment "BIOR"                                                                                                                                      | Latvia              |
| National Food and Veterinary Risk Assessment Institute                                                                                                                                              | Lithuania           |
| Ministry of Agriculture, Ministry of Health                                                                                                                                                         | Luxembourg          |
| Malta Competition and Consumer Affairs Authority                                                                                                                                                    | Malta               |
| FHI (The Norwegian Institute of Public Health)                                                                                                                                                      | Norway              |
| VKM (The Norwegian Scientific Committee for Food Safety)                                                                                                                                            | Norway              |
| NVWA (Food and Consumer Product Safety Authority)                                                                                                                                                   | Netherlands         |
| PBL (Netherlands Environmental Assessment Agency)                                                                                                                                                   | Netherlands         |
| RIVM (National Institute of Public Health and the Environment)                                                                                                                                      | Netherlands         |
| RIVM/MNP (Netherlands Environmental Assessment Agency)                                                                                                                                              | Netherlands         |
| IRAS (University of Utrecht · Institute for Risk Assessment Sciences)                                                                                                                               | Netherlands         |
| ASAE (Portuguese Economy and Food Safety Authority)                                                                                                                                                 | Portugal            |
| Ministry of Agriculture and Rural Development of the Slovak Republic                                                                                                                                | Slovak Republic     |
| Ministry of Agriculture of the Czech Republic                                                                                                                                                       | Czech Republic      |
| Polish EFSA Focal Point                                                                                                                                                                             | Poland              |

|                                                                   |                |
|-------------------------------------------------------------------|----------------|
| National Sanitary Veterinary and Food Safety Authority            | Romania        |
| FERA (Food and Environment Research Agency)                       | United Kingdom |
| FSA (UK Food Standards Agency)                                    | United Kingdom |
| Centre for Mathematical Sciences (Cambridge)                      | United Kingdom |
| Imperial College London                                           | United Kingdom |
| MRC (Medical Research Council)                                    | United Kingdom |
| University of Durham                                              | United Kingdom |
| Ministry of Agriculture Forestry and Food                         | Slovenia       |
| SLV (National Food Agency)                                        | Sweden         |
| FSVO (Federal Food Safety and Veterinary Office)                  | Switzerland    |
| ETH Zurich (Swiss Federal Institute of Technology in Zurich)      | Switzerland    |
| INSPQ (Institut national de santé publique du Québec)             | Canada         |
| Health Canada                                                     | Canada         |
| ATSDR (Agency for Toxic Substances and Disease Registry)          | USA            |
| US FDA (US Food and Drug Administration)                          | USA            |
| NIOSH (CDC-National Institute for Occupational Safety and Health) | USA            |
| NIEHS (NIH - National Institute of Environmental Health Sciences) | USA            |
| US NRC (United States Nuclear Regulatory Commission)              | USA            |
| NZFSA (New Zealand Food Safety Authority)                         | New Zealand    |

**Table S2.** Definitions of weight of evidence and line of evidence identified in the literature

| Reference                | Definition                                                                                                                                                                                                                                                                                                                                                                                                                                                                                                                                                                                                                                                                                                                                                                                                                                                                                                                                                                                                                                                                                                                                  | Interpretation                                                                       |
|--------------------------|---------------------------------------------------------------------------------------------------------------------------------------------------------------------------------------------------------------------------------------------------------------------------------------------------------------------------------------------------------------------------------------------------------------------------------------------------------------------------------------------------------------------------------------------------------------------------------------------------------------------------------------------------------------------------------------------------------------------------------------------------------------------------------------------------------------------------------------------------------------------------------------------------------------------------------------------------------------------------------------------------------------------------------------------------------------------------------------------------------------------------------------------|--------------------------------------------------------------------------------------|
| Rhomberg et al. (2013)   | “When we refer to WOE frameworks, we mean approaches that have been developed for taking the process all the way from scoping of the assessment and initial identification of relevant studies through the drawing of appropriate conclusions.”                                                                                                                                                                                                                                                                                                                                                                                                                                                                                                                                                                                                                                                                                                                                                                                                                                                                                             |                                                                                      |
| Krimsky et al. (2005)    | “Walker (1996) cites three objectives of a WOE analysis: (1) it provides a clear and transparent framework for evaluating the evidence in a risk determination; (2) it offers regulatory agencies a consistent and standardized approach to evaluating toxic substances; (3) it helps to identify the discretionary assumptions in risk determinations from experts.”                                                                                                                                                                                                                                                                                                                                                                                                                                                                                                                                                                                                                                                                                                                                                                       | Transparent framework for drawing conclusions                                        |
| USEPA (2005; 2011)       | EPA often uses the term in the context of a WOE “narrative.” In the case of a carcinogenic risk assessment, the narrative consists of a short summary that “explains what is known about an agent’s human carcinogenic potential and the conditions that characterize its expression” (USEPA 2011). In EPA’s Guidelines for Carcinogen Risk Assessment, the WOE narrative “explains the kinds of evidence available and how they fit together in drawing conclusions, and it points out significant issues/strengths/limitations of the data and conclusions” (USEPA 2005, p. 1-12).                                                                                                                                                                                                                                                                                                                                                                                                                                                                                                                                                        |                                                                                      |
| Krimsky et al. (2005)    | “A process or method in which all scientific evidence that is relevant to the status of a causal hypothesis is taken into account.”                                                                                                                                                                                                                                                                                                                                                                                                                                                                                                                                                                                                                                                                                                                                                                                                                                                                                                                                                                                                         |                                                                                      |
| Hope and Clarkson (2014) | “The process of considering the strengths and weaknesses of various pieces of information in order to inform a decision being made among competing alternatives”                                                                                                                                                                                                                                                                                                                                                                                                                                                                                                                                                                                                                                                                                                                                                                                                                                                                                                                                                                            | Process of considering the strengths and weaknesses of various pieces of information |
| USEPA (2014)             | “The present committee found that the phrase weight of evidence has become far too vague as used in practice today and thus is of little scientific use. In some accounts, it is characterized as an oversimplified balance scale on which evidence supporting hazard is placed on one side and evidence-refuting hazard on the other. That analogy neglects to account for the total weight on either side (that is the scope of evidence available) or captures only where the balance stands. Others characterize WOE as a single scale, and different kinds of evidence have different weights. For example, a single human study with low risk of bias might be considered as providing the same evidential weight as three well-conducted animal studies. The weights might be adjusted according to the quality of the study design. This analogy neglects to account for the weight for vs the weight against hazard. Perhaps the overall idea of the WOE for hazard should combine both characterizations. It is evident, however, that its use in the literature and by scientific agencies, including EPA, is vague and varied.” |                                                                                      |
| Krimsky et al. (2005)    | “Includes all varieties of evidence, positive and negative, mechanistic and non-mechanistic, in vivo and in vitro, as well as human and animal studies.”                                                                                                                                                                                                                                                                                                                                                                                                                                                                                                                                                                                                                                                                                                                                                                                                                                                                                                                                                                                    |                                                                                      |
| Alexander et al. (2012)  | “Several well-established methods of evidence-based research synthesis: the hierarchy of research study designs, the systematic narrative review, meta-analysis, and application of so-called causal criteria. Our approach to WOE included the idea that all (rather than some) of the evidence would be considered, emphasizing (i.e., putting more weight) studies that tested the scientific hypotheses better than others.”                                                                                                                                                                                                                                                                                                                                                                                                                                                                                                                                                                                                                                                                                                            |                                                                                      |
| Linkov et al. (2009)     | “Weight of evidence (WOE) can be defined as a framework for synthesizing individual lines of evidence, using methods that are either qualitative (examining distinguishing attributes) or quantitative (measuring aspects in terms of magnitude) to develop conclusions regarding questions concerned with the degree of impairment or risk. In general, qualitative methods include presentation of individual lines of evidence without an attempt at integration, or integration through a standardized evaluation of individual lines of evidence based on qualitative considerations. Quantitative methods include integration of multiple lines of evidence using weighting, ranking, or indexing as well as structured decision or statistical models.”                                                                                                                                                                                                                                                                                                                                                                              | Integration of different lines of evidence                                           |
| Goodman et al. (2010)    | WOE = “a methodology with a simple premise: that all available evidence should be examined and interpreted (Weed 2005)”.                                                                                                                                                                                                                                                                                                                                                                                                                                                                                                                                                                                                                                                                                                                                                                                                                                                                                                                                                                                                                    |                                                                                      |
| Khosroyan et al. (2015)  | Integration of different lines of evidence (chemical concentrations, toxicological responses, in situ surveys) lies at the basis of the WOE approach                                                                                                                                                                                                                                                                                                                                                                                                                                                                                                                                                                                                                                                                                                                                                                                                                                                                                                                                                                                        |                                                                                      |
| Piva et al. (2011)       | “the concept of weight of evidence (WOE) integrates data from different studies, or lines of evidence (LOEs), that address questions relating to the presence of chemical pollutants, their bioavailability, and the onset of adverse effects at                                                                                                                                                                                                                                                                                                                                                                                                                                                                                                                                                                                                                                                                                                                                                                                                                                                                                            |                                                                                      |

|                          |                                                                                                                                                                                                                                                                                                                               |                   |
|--------------------------|-------------------------------------------------------------------------------------------------------------------------------------------------------------------------------------------------------------------------------------------------------------------------------------------------------------------------------|-------------------|
|                          | different levels of biological organization, i.e. from a molecular level to organism or community effects (Chapman and Hollert, 2006)”                                                                                                                                                                                        |                   |
| Marvier (2011)           | “Sometimes the phrase weight of evidence is invoked when a reviewer has simply drawn her or his own conclusions about a series of studies without any formal analytical tools, whereas on other occasions weight of evidence is used to describe a rigorous quantitative synthesis of effect size from multiple experiments.” |                   |
| Hope and Clarkson (2014) | “In short, a WOE approach is a synthetic process that combines the information content of multiple weighted pieces of evidence (Suter and Cormier 2011)”.                                                                                                                                                                     |                   |
| Gosling et al. (2013)    | “WOE consists in combining lines of evidence of varying quality in a risk assessment”                                                                                                                                                                                                                                         |                   |
| Linkov et al. (2011)     | “WOE consists of a diverse set of methods, often built for particular applications”                                                                                                                                                                                                                                           |                   |
| Hristozov et al. (2014a) | “Set of information used to evaluate endpoint. Lines of evidence are not all equally important in making the overall conclusion”                                                                                                                                                                                              | No interpretation |
| Hope and Clarkson (2014) | “Line of evidence is a measure associated with a specific risk hypothesis. Multiple lines of evidence can be associated with a single risk hypothesis”                                                                                                                                                                        |                   |

Note: USEPA, U.S. Environmental Protection Agency

**Figure S1.** Template to summarize WOE information from Source Documents

| Description of the document |                                                       |  |                        |
|-----------------------------|-------------------------------------------------------|--|------------------------|
| 1                           | Document ID                                           |  | 2 Name of the reviewer |
| 3                           | Year of publication                                   |  | 4 Type of document     |
| 5                           | # pages of interest                                   |  |                        |
| 6                           | Authors/Institution (country)                         |  |                        |
| 7                           | Title                                                 |  |                        |
| 8                           | Document Status                                       |  |                        |
| 9                           | Document selected for further consideration: Yes - No |  |                        |

  

|    |                               |                                |    |                                                                   |
|----|-------------------------------|--------------------------------|----|-------------------------------------------------------------------|
| 10 | <b>Domain covered</b>         |                                | 11 | <b>Study type</b>                                                 |
|    | Occupational health: Yes - No | Environmental Health: Yes - No |    | Assessment of individual study: Yes - No                          |
|    | Microbiology (food): Yes - No | Chemistry (food): Yes - No     |    | Assessment of synthesis of studies or lines of evidence: Yes - No |
|    | Animal health: Yes - No       | Nutrition: Yes - No            |    |                                                                   |
|    | Plant health: Yes - No        | Other:                         |    |                                                                   |

  

| Elements of WOE described in the document |                                                                                                                                                                                                                                                                                                                                                                  |                                      |  |                                       |  |                                    |  |                                 |  |                 |  |
|-------------------------------------------|------------------------------------------------------------------------------------------------------------------------------------------------------------------------------------------------------------------------------------------------------------------------------------------------------------------------------------------------------------------|--------------------------------------|--|---------------------------------------|--|------------------------------------|--|---------------------------------|--|-----------------|--|
| 11                                        | Definition of Weight of Evidence:                                                                                                                                                                                                                                                                                                                                |                                      |  |                                       |  |                                    |  |                                 |  |                 |  |
| 12                                        | Approaches developed or recommended (Names and references):                                                                                                                                                                                                                                                                                                      |                                      |  |                                       |  |                                    |  |                                 |  |                 |  |
| 14                                        | Types of studies considered - Comments/Description of considerations in assessing/weighting                                                                                                                                                                                                                                                                      |                                      |  |                                       |  |                                    |  |                                 |  |                 |  |
|                                           | <table border="1"> <tbody> <tr> <td>In vivo experimental study: Yes - No</td> <td></td> </tr> <tr> <td>In vitro experimental study: Yes - No</td> <td></td> </tr> <tr> <td>Human intervention study: Yes - No</td> <td></td> </tr> <tr> <td>Epidemiological study: Yes - No</td> <td></td> </tr> <tr> <td>Other: Yes - No</td> <td></td> </tr> </tbody> </table> | In vivo experimental study: Yes - No |  | In vitro experimental study: Yes - No |  | Human intervention study: Yes - No |  | Epidemiological study: Yes - No |  | Other: Yes - No |  |
| In vivo experimental study: Yes - No      |                                                                                                                                                                                                                                                                                                                                                                  |                                      |  |                                       |  |                                    |  |                                 |  |                 |  |
| In vitro experimental study: Yes - No     |                                                                                                                                                                                                                                                                                                                                                                  |                                      |  |                                       |  |                                    |  |                                 |  |                 |  |
| Human intervention study: Yes - No        |                                                                                                                                                                                                                                                                                                                                                                  |                                      |  |                                       |  |                                    |  |                                 |  |                 |  |
| Epidemiological study: Yes - No           |                                                                                                                                                                                                                                                                                                                                                                  |                                      |  |                                       |  |                                    |  |                                 |  |                 |  |
| Other: Yes - No                           |                                                                                                                                                                                                                                                                                                                                                                  |                                      |  |                                       |  |                                    |  |                                 |  |                 |  |
| 15                                        | Relevant case studies                                                                                                                                                                                                                                                                                                                                            |                                      |  |                                       |  |                                    |  |                                 |  |                 |  |
| 16                                        | Limitations of application of the approach/recommendations                                                                                                                                                                                                                                                                                                       |                                      |  |                                       |  |                                    |  |                                 |  |                 |  |
| 17                                        | WOE ranking                                                                                                                                                                                                                                                                                                                                                      |                                      |  |                                       |  |                                    |  |                                 |  |                 |  |
| 18                                        | Criteria for levels of evidence:                                                                                                                                                                                                                                                                                                                                 |                                      |  |                                       |  |                                    |  |                                 |  |                 |  |
| 19                                        | Additional information (WOE communication, WOE process, etc.):                                                                                                                                                                                                                                                                                                   |                                      |  |                                       |  |                                    |  |                                 |  |                 |  |

## REFERENCES

- Alexander DD, Weed DL, Mink PJ, Mitchell ME. 2012. A weight-of-evidence review of colorectal cancer in pesticide applicators: the agricultural health study and other epidemiologic studies. *Int Arch Occup Environ Health* 85:715–745, doi:10.1007/s00420-011-0723-7.
- Chapman PM, Hollert H. 2006. Should the sediment quality triad become a tetrad, a pentad, or possibly even a hexad? *J Soils Sediments* 6:4–8; <https://doi.org/10.1065/jss2006.01.152>.
- Goodman M, Squibb K, Youngstrom E, Anthony JG, Kenworthy L, Lipkin PH, et al. 2010. Using systematic reviews and meta-analyses to support regulatory decision making for neurotoxicants: lessons learned from a case study of PCBs. *Environ Health Perspect* 118(6):727-34; doi:10.1289/ehp.0901835.
- Gosling JP, Hart A, Owen H, David M, Li J, MacKay C. 2013. A Bayes linear approach to weight-of-evidence risk assessment for skin allergy. *Bayesian Anal* 8(1):169-186; doi:10.1214/13-BA807.
- Hope BK, Clarkson JR. 2014. A Strategy for Using Weight-of-Evidence Methods in Ecological Risk Assessments. *Hum Ecol Risk Assess* 20(2):290-315; doi:10.1080/10807039.2013.781849.
- Hristozov DR, Gottardo S, Cinelli M, Isigonis P, Zabeo A, Critto A, et al. 2014a. Application of a quantitative weight of evidence approach for ranking and prioritising occupational exposure scenarios for titanium dioxide and carbon nanomaterials. *Nanotoxicology* 8(2):117-31; doi:10.3109/17435390.2012.760013.
- Khosrovyan A, Rodríguez-Romero A, Antequera Ramos M, DeIvalls TA, Riba I. 2015. Comparative analysis of two weight-of-evidence methodologies for integrated sediment quality assessment. *Chemosphere* 120:138-144; doi: 10.1016/j.chemosphere.2014.06.043.
- Krimsky S. 2005. The weight of scientific evidence in policy and law. *Am J Public Health* 95 Suppl 1:S129-36; doi:10.2105/ajph.2004.044727.
- Linkov I, Loney D, Cormier S, Satterstrom FK, Bridges T. 2009. Weight-of-evidence evaluation in environmental assessment: review of qualitative and quantitative approaches. *Sci Total Environ* 407(19):5199-205; doi:10.1016/j.scitotenv.2009.05.004.
- Linkov I., Welle P, Loney D, Tkachuk A, Canis L, Kim JB, et al. 2011. Use of multicriteria decision analysis to support weight of evidence evaluation. *Risk Anal* 31(8):1211-25; doi:10.1111/j.1539-6924.2011.01585.x.
- Marvier M. 2011. Using meta-analysis to inform risk assessment and risk management. *J Verbrauch Lebensm* 6(1):113-118; doi:10.1007/s00003-011-0675-6.
- Piva F, Ciaprini F, Onorati F, Benedetti M, Fattorini D, Ausili A., et al. 2011. Assessing sediment hazard through a weight of evidence approach with bioindicator organisms: A practical model to elaborate data from sediment chemistry, bioavailability, biomarkers and ecotoxicological bioassays. *Chemosphere* 83:475-485; doi: 10.1016/j.chemosphere.2010.12.064.
- Rhomberg LR, Goodman JE, Bailey LA, Prueitt RL, Beck NB, Bevan C, et al. 2013. A survey of frameworks for best practices in weight-of-evidence analyses. *Crit Rev Toxicol* 43(9):753-84; doi:10.3109/10408444.2013.832727.

Suter GW, Cormier SM. 2011. Why and how to combine evidence in environmental assessments: weighing evidence and building cases. *Sci Total Environ* 409(8):1406-17; doi:10.1016/j.scitotenv.2010.12.029.

USEPA. 2005. Guidelines for Carcinogen Risk Assessment. TR EPA/630/P-03/001F. Risk Assessment Forum, Washington, DC: U.S. Environmental Protection Agency. Available: [http://www.epa.gov/raf/publications/pdfs/CANCER\\_GUIDELINES\\_FINAL](http://www.epa.gov/raf/publications/pdfs/CANCER_GUIDELINES_FINAL)

USEPA. 2011. National Air Toxics Assessment – Glossary of terms. Available: <https://www.epa.gov/national-air-toxics-assessment/nata-glossary-terms>. Accessed July 4 2017.

USEPA. 2014. Framework for Human Health Risk Assessment to Inform Decision Making. edited by EPA Risk Assessment Forum. Washington DC: U.S. Environmental Protection Agency.

Walker VR. 1996. Risk Characterization and the Weight of Evidence: Adapting Gatekeeping Concepts from the Courts. *Risk Anal* 14: 793-799.
